# Supplementary material for: No increase in small-solute transport in peritoneal dialysis patients treated without hypertonic glucose for fifty-four months
Source: Springer Nature journal article supplement (doi:10.1186/s12882-017-0690-7), 2017-08-31
Supplement: MOESM1 [file 14960312]

---

## Supplementary Data

BMC Nephrology

**Article: No increase in small-solute transport in peritoneal dialysis patients treated without hypertonic glucose for fifty-four months.**

Dominique Pagniez, Alain Duhamel, Eric Boulanger, Celia Lessore de Sainte Foy, Jean-Baptiste Beuscart

---

**S-Table 1: Covariance parameters derived from the linear mixed model fitted on the whole data from inclusion to end of follow-up.** In this model, we considered a linear and quadratic time effect as well as a random intercept, a random linear and quadratic time effect.

---

|                     | Intercept  | Time        | (Time) <sup>2</sup> |
|---------------------|------------|-------------|---------------------|
| Intercept           | 0.00616269 | -0.00157265 | 0.00014259          |
| Time                |            | 0.00100794  | -9.58505E-05        |
| (Time) <sup>2</sup> |            |             | 9.41376E-06         |

---
